# Supplementary material
Source: PubMed Central journal article supplement (PMC30146)
Supplement: pnas_041617698_2.pdf [file pnas_041617698_2.pdf]

Table 1. Indexing of power diffraction maxima of GNNQQNY microcrystals: Comparison of observed and calculated peak positions

|   | $h$ | $k$ | $l$ | $s, 1/\text{\AA}$ | $d, \text{\AA}$ | $r_{\text{calc}}, \text{pixels}$ | $r_{\text{obs}}, \text{pixels}$ |
|---|-----|-----|-----|-------------------|-----------------|----------------------------------|---------------------------------|
| A | 0   | 1   | 0   | 0.025             | 39.437          | 95.8                             | SYS ABS                         |
| B | 1   | 0   | 0   | 0.044             | 22.634          | 167.1                            | 166.2                           |
| C | 0   | 2   | 0   | 0.051             | 19.719          | 191.8                            | 191.9                           |
| C | 1   | 1   | 0   | 0.051             | 19.630          | 192.7                            | 191.9                           |
| D | 1   | 2   | 0   | 0.067             | 14.868          | 254.6                            | 254.4                           |
| E | 0   | 3   | 0   | 0.076             | 13.146          | 288.1                            | SYS ABS                         |
| F | 1   | 3   | 0   | 0.088             | 11.367          | 333.4                            | 333.5                           |
| F | 2   | 0   | 0   | 0.088             | 11.317          | 334.9                            | 333.5                           |
| G | 2   | 1   | 0   | 0.092             | 10.878          | 348.6                            | 348.2                           |
| H | 0   | 4   | 0   | 0.101             | 9.859           | 384.8                            | 385.2                           |
| H | 2   | 2   | 0   | 0.102             | 9.815           | 386.6                            | 385.2                           |
| I | 1   | 4   | 0   | 0.111             | 9.039           | 420.1                            | 420.1                           |
| J | 2   | 3   | 0   | 0.117             | 8.576           | 443.0                            | 442.8                           |
| K | 0   | 5   | 0   | 0.127             | 7.887           | 482.2                            | SYS ABS                         |
| L | 3   | 0   | 0   | 0.133             | 7.545           | 504.4                            | 512.3                           |
| L | 1   | 5   | 0   | 0.134             | 7.448           | 511.0                            | 512.3                           |
| L | 2   | 4   | 0   | 0.135             | 7.434           | 512.0                            | 512.3                           |
| L | 3   | 1   | 0   | 0.135             | 7.410           | 513.7                            | 512.3                           |
| M | 3   | 2   | 0   | 0.142             | 7.046           | 540.6                            | 540.6                           |
| N | 0   | 6   | 0   | 0.152             | 6.573           | 580.3                            | 581.2                           |
| N | 3   | 3   | 0   | 0.153             | 6.543           | 582.9                            | 581.2                           |
| N | 2   | 5   | 0   | 0.155             | 6.471           | 589.6                            | 581.2                           |
| O | 1   | 6   | 0   | 0.158             | 6.312           | 604.7                            | 605.0                           |
| P | 3   | 4   | 0   | 0.167             | 5.992           | 637.8                            | 637.8                           |
| Q | 2   | 6   | 0   | 0.176             | 5.684           | 673.2                            | 674.4                           |
| Q | 4   | 0   | 0   | 0.177             | 5.658           | 676.3                            | 674.4                           |
| Q | 0   | 7   | 0   | 0.177             | 5.634           | 679.3                            | SYS ABS                         |
| Q | 4   | 1   | 0   | 0.179             | 5.601           | 683.4                            | 674.4                           |
| R | 1   | 7   | 0   | 0.183             | 5.467           | 700.6                            | 701.4                           |
| R | 3   | 5   | 0   | 0.183             | 5.452           | 702.6                            | 701.4                           |
| R | 4   | 2   | 0   | 0.184             | 5.439           | 704.3                            | 701.4                           |
| S | 4   | 3   | 0   | 0.192             | 5.197           | 738.0                            | 738.0                           |
| T | 2   | 7   | 0   | 0.198             | 5.043           | 761.2                            | 777.5                           |
| U | 3   | 6   | 0   | 0.202             | 4.956           | 775.1                            | 777.5                           |
| U | 0   | 8   | 0   | 0.203             | 4.930           | 779.4                            | 777.5                           |
| U | 4   | 4   | 0   | 0.204             | 4.908           | 783.0                            | 777.5                           |
| V | 0   | 0   | 1   | 0.207             | 4.825           | 796.9                            | 798.2                           |
| V | 1   | 8   | 0   | 0.208             | 4.817           | 798.3                            | 798.2                           |

|   |   |    |   |       |       |        |         |
|---|---|----|---|-------|-------|--------|---------|
| V | 0 | 1  | 1 | 0.209 | 4.789 | 803.0  | 798.2   |
| W | 1 | 0  | 1 | 0.212 | 4.719 | 815.4  | 815.1   |
| W | 0 | 2  | 1 | 0.213 | 4.687 | 821.2  | 815.1   |
| W | 1 | 1  | 1 | 0.213 | 4.686 | 821.5  | 815.1   |
| X | 4 | 5  | 0 | 0.218 | 4.598 | 837.8  | 837.5   |
| X | 1 | 2  | 1 | 0.218 | 4.590 | 839.3  | 837.5   |
| Y | 0 | 3  | 1 | 0.221 | 4.530 | 850.9  | 855.4   |
| Y | 5 | 0  | 0 | 0.221 | 4.527 | 851.5  | 855.4   |
| Y | 2 | 8  | 0 | 0.221 | 4.519 | 852.9  | 855.4   |
| Y | 3 | 7  | 0 | 0.222 | 4.514 | 853.9  | 855.4   |
| Y | 5 | 1  | 0 | 0.222 | 4.497 | 857.3  | 855.4   |
| Z | 1 | 3  | 1 | 0.225 | 4.442 | 868.4  | 873.7   |
| Z | 2 | 0  | 1 | 0.225 | 4.439 | 869.1  | 873.7   |
| Z | 5 | 2  | 0 | 0.227 | 4.412 | 874.5  | 873.7   |
| Z | 2 | 1  | 1 | 0.227 | 4.411 | 874.8  | 873.7   |
| a | 0 | 9  | 0 | 0.228 | 4.382 | 880.8  | SYS ABS |
| b | 0 | 4  | 1 | 0.231 | 4.334 | 891.0  | 900.9   |
| b | 2 | 2  | 1 | 0.231 | 4.330 | 891.8  | 900.9   |
| c | 1 | 9  | 0 | 0.232 | 4.302 | 897.9  | 900.9   |
| c | 4 | 6  | 0 | 0.233 | 4.288 | 900.9  | 900.9   |
| c | 5 | 3  | 0 | 0.234 | 4.280 | 902.7  | 900.9   |
| d | 1 | 4  | 1 | 0.235 | 4.257 | 907.9  | 900.9   |
| e | 2 | 3  | 1 | 0.238 | 4.205 | 919.5  | 917.1   |
| f | 3 | 8  | 0 | 0.242 | 4.127 | 937.8  | 941.2   |
| f | 0 | 5  | 1 | 0.243 | 4.116 | 940.4  | 941.2   |
| f | 5 | 4  | 0 | 0.243 | 4.114 | 940.9  | 941.2   |
| g | 2 | 9  | 0 | 0.245 | 4.086 | 947.6  | 947.7   |
| h | 3 | 0  | 1 | 0.246 | 4.065 | 952.8  | 947.7   |
| h | 1 | 5  | 1 | 0.247 | 4.050 | 956.6  | 947.7   |
| h | 2 | 4  | 1 | 0.247 | 4.047 | 957.2  | 947.7   |
| h | 3 | 1  | 1 | 0.247 | 4.044 | 958.1  | 947.7   |
| i | 4 | 7  | 0 | 0.250 | 3.992 | 971.0  | 971.3   |
| i | 3 | 2  | 1 | 0.251 | 3.981 | 973.9  | 971.3   |
| j | 0 | 10 | 0 | 0.254 | 3.944 | 983.6  | 989.7   |
| j | 5 | 5  | 0 | 0.255 | 3.926 | 988.3  | 989.7   |
| k | 0 | 6  | 1 | 0.257 | 3.890 | 998.1  | 997.9   |
| k | 1 | 10 | 0 | 0.257 | 3.885 | 999.3  | 997.9   |
| k | 3 | 3  | 1 | 0.258 | 3.884 | 999.7  | 997.9   |
| k | 2 | 5  | 1 | 0.259 | 3.868 | 1003.9 | 997.9   |
| k | 1 | 6  | 1 | 0.261 | 3.833 | 1013.5 | 997.9   |
| l | 3 | 9  | 0 | 0.264 | 3.789 | 1026.1 | 1031.0  |
| l | 6 | 0  | 0 | 0.265 | 3.772 | 1030.9 | 1031.0  |
| l | 3 | 4  | 1 | 0.266 | 3.758 | 1035.0 | 1031.0  |
| l | 6 | 1  | 0 | 0.266 | 3.755 | 1035.9 | 1031.0  |
| m | 5 | 6  | 0 | 0.268 | 3.728 | 1043.9 | 1046.7  |

|   |   |    |   |       |       |        |         |
|---|---|----|---|-------|-------|--------|---------|
| m | 2 | 10 | 0 | 0.269 | 3.724 | 1045.1 | 1046.7  |
| m | 4 | 8  | 0 | 0.269 | 3.717 | 1047.2 | 1046.7  |
| m | 6 | 2  | 0 | 0.270 | 3.705 | 1050.7 | 1046.7  |
| n | 2 | 6  | 1 | 0.272 | 3.678 | 1058.8 | 1063.5  |
| n | 4 | 0  | 1 | 0.272 | 3.672 | 1060.9 | 1063.5  |
| n | 0 | 7  | 1 | 0.273 | 3.665 | 1063.0 | 1063.5  |
| n | 4 | 1  | 1 | 0.274 | 3.656 | 1065.8 | 1063.5  |
| o | 6 | 3  | 0 | 0.276 | 3.626 | 1075.1 | 1063.5  |
| o | 1 | 7  | 1 | 0.276 | 3.618 | 1077.7 | 1063.5  |
| o | 3 | 5  | 1 | 0.277 | 3.613 | 1079.1 | 1063.5  |
| o | 4 | 2  | 1 | 0.277 | 3.609 | 1080.3 | 1063.5  |
| p | 0 | 11 | 0 | 0.279 | 3.585 | 1088.1 | SYS ABS |
| q | 1 | 11 | 0 | 0.282 | 3.541 | 1102.6 | 1104.5  |
| q | 4 | 3  | 1 | 0.283 | 3.536 | 1104.2 | 1104.5  |
| q | 5 | 7  | 0 | 0.283 | 3.529 | 1106.7 | 1104.5  |
| q | 6 | 4  | 0 | 0.284 | 3.523 | 1108.6 | 1104.5  |
| r | 3 | 10 | 0 | 0.286 | 3.495 | 1118.1 | 1122.4  |
| r | 2 | 7  | 1 | 0.287 | 3.487 | 1121.0 | 1122.4  |
| s | 4 | 9  | 0 | 0.289 | 3.465 | 1128.7 | 1131.4  |
| s | 3 | 6  | 1 | 0.289 | 3.457 | 1131.2 | 1131.4  |
| s | 0 | 8  | 1 | 0.290 | 3.448 | 1134.4 | 1131.4  |
| t | 4 | 4  | 1 | 0.291 | 3.441 | 1137.0 | 1137.8  |
| u | 2 | 11 | 0 | 0.293 | 3.418 | 1145.2 | 1137.8  |
| u | 1 | 8  | 1 | 0.293 | 3.409 | 1148.4 | 1137.8  |
| u | 6 | 5  | 0 | 0.294 | 3.403 | 1150.5 | 1137.8  |

Table contents correspond to data from Figure 3. The first column corresponds to peak labels in Figure 3. Other columns are labeled in the table.
